# Supplementary material for: Comment on “Strong Be–Be bonds in double-aromatic bridged Be2(μ-SO) molecules” by F. Rezaie and S. Noorizadeh,Dalton Transactions, 2022, 51, 12596
Source: Royal Society of Chemistry journal article supplement (doi:10.1039/d3dt00774j), 2023-01-01
Supplement: d3dt00774j1.pdf [file d3dt00774j1.pdf]

## **Supporting Information**

**of**

**Comment on "Strong Be–Be bonds in double-aromatic  
bridged Be<sub>2</sub>(μ-SO) molecules" by F. Rezaie and S.  
Noorizadeh, Dalton Transactions, 2022, 51, 12596**

Cartesian coordinates of the optimized geometries along with their total energies (a.u) calculated at  $\omega$ B97XD/cc-pVTZ.

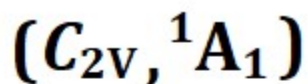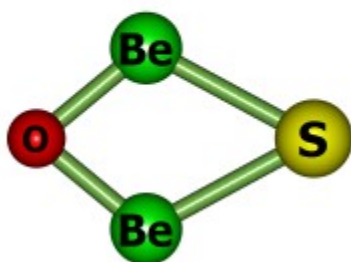

|                                              |                                       |
|----------------------------------------------|---------------------------------------|
| Sum of electronic and zero-point Energies=   | -503.047009                           |
| Sum of electronic and thermal Energies=      | -503.043446                           |
| Sum of electronic and thermal Enthalpies=    | -503.042502                           |
| Sum of electronic and thermal Free Energies= | -503.072943                           |
| 4                                            | 0.577172000 -0.923579000 -0.001523000 |
| 4                                            | 0.576997000 0.923811000 -0.001522000  |
| 8                                            | 1.699587000 -0.000041000 0.000920000  |
| 16                                           | -1.138336000 -0.000037000 0.000301000 |

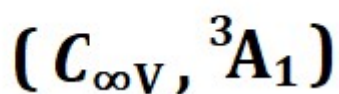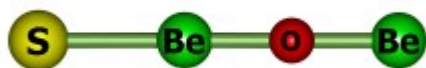

|                                              |                                       |
|----------------------------------------------|---------------------------------------|
| Sum of electronic and zero-point Energies=   | -502.994900                           |
| Sum of electronic and thermal Energies=      | -502.989900                           |
| Sum of electronic and thermal Enthalpies=    | -502.988956                           |
| Sum of electronic and thermal Free Energies= | -503.018848                           |
| 4                                            | -3.077181000 -0.000101000 0.000015000 |

|    |              |              |              |
|----|--------------|--------------|--------------|
| 4  | -0.257833000 | 0.003109000  | -0.000004000 |
| 8  | -1.667746000 | -0.000825000 | -0.000010000 |
| 16 | 1.667627000  | -0.000339000 | 0.000002000  |

**(C<sub>2v</sub>, <sup>3</sup>A<sub>1</sub>)**

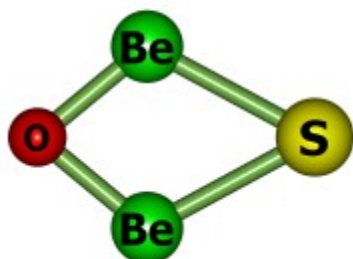

|                                              |             |
|----------------------------------------------|-------------|
| Sum of electronic and zero-point Energies=   | -502.939685 |
| Sum of electronic and thermal Energies=      | -502.935819 |
| Sum of electronic and thermal Enthalpies=    | -502.934875 |
| Sum of electronic and thermal Free Energies= | -502.967113 |

|    |              |              |              |
|----|--------------|--------------|--------------|
| 4  | -0.636578000 | -1.020895000 | 0.000023000  |
| 4  | -0.637303000 | 1.021507000  | 0.000022000  |
| 8  | -1.677774000 | -0.000324000 | -0.000117000 |
| 16 | 1.157357000  | 0.000009000  | 0.000047000  |

**(C<sub>s</sub>, <sup>1</sup>A')**

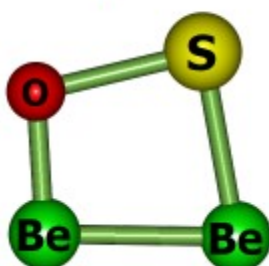

|                                            |             |
|--------------------------------------------|-------------|
| Sum of electronic and zero-point Energies= | -502.882378 |
| Sum of electronic and thermal Energies=    | -502.878100 |

Sum of electronic and thermal Enthalpies= -502.877156  
 Sum of electronic and thermal Free Energies= -502.909049

|    |              |              |              |
|----|--------------|--------------|--------------|
| 4  | 1.556015000  | 0.547425000  | -0.000141000 |
| 4  | -0.103090000 | 1.621739000  | 0.000105000  |
| 8  | 0.860863000  | -0.727157000 | 0.000078000  |
| 16 | -0.793663000 | -0.178713000 | -0.000030000 |

**(C<sub>2v</sub>, <sup>1</sup>A<sub>1</sub>)**

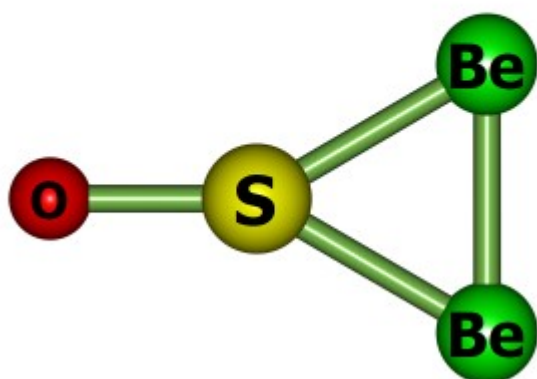

Sum of electronic and zero-point Energies= -502.796226  
 Sum of electronic and thermal Energies= -502.791852  
 Sum of electronic and thermal Enthalpies= -502.790908  
 Sum of electronic and thermal Free Energies= -502.822939

|    |              |              |              |
|----|--------------|--------------|--------------|
| 4  | -1.626189000 | 0.972744000  | 0.000132000  |
| 4  | -1.627293000 | -0.971795000 | 0.000134000  |
| 8  | 1.540415000  | 0.000171000  | 0.000089000  |
| 16 | 0.043163000  | -0.000323000 | -0.000111000 |
